## Understanding policing as a mechanism of cheater control in cooperating bacteria

2

Tobias Wechsler<sup>1</sup>, Rolf Kümmerli<sup>1</sup> and Akos Dobay<sup>2,3</sup>

4

<sup>1</sup>Department of Plant and Microbial Biology, University of Zurich, Zurich, Switzerland.

6 <sup>2</sup>Department of Evolutionary Biology and Environmental Studies, University of Zurich, Zurich,  
Switzerland.

8 <sup>3</sup>Zurich Institute of Forensic Medicine, University of Zurich, Zurich, Switzerland.

10 **Email addresses:** [tobias.wechsler@uzh.ch](mailto:tobias.wechsler@uzh.ch), [rolf.kuemmerli@uzh.ch](mailto:rolf.kuemmerli@uzh.ch), [akos.dobay@uzh.ch](mailto:akos.dobay@uzh.ch)

12 **Corresponding author:** Akos Dobay, Zurich Institute of Forensic Medicine, University of  
Zurich, Winterthurerstrasse 190/52, CH-8057 Zurich, Switzerland

14 Tel. +41 (0) 44 635 76 72, Fax +41 (0) 44 635 54 90, Email: Akos.Dobay@uzh.ch

16 **Running head:** Policing & cheater control in cooperating bacteria

18 **Keywords:** individual-based simulation, public goods dilemma, evolution of cooperation,  
cheater control mechanism, sociomicrobiology

20

## 22 **Abstract**

23 Policing occurs in insect, animal and human societies, where it is used as a conditional strategy  
24 to prevent cheating and enforce cooperation. Recently, it has been suggested that policing might  
25 even be relevant in enforcing cooperation in much simpler organisms such as bacteria. Here,  
26 we used individual-based modelling to develop an evolutionary concept for policing in bacteria,  
27 and identify the conditions under which it can be adaptive. We modelled interactions between  
28 cooperators, producing a beneficial public good, cheaters exploiting the public good without  
29 contributing to it, and public good producing policers that secrete a toxin to selectively target  
30 cheaters. We found that toxin-mediated policing is favored when (i) toxins are potent and  
31 durable, (ii) cheap to produce, (iii) cell and public good diffusion is intermediate, and (iv) toxins  
32 diffuse farther than the public good. Overall, we show that toxin-mediated policing can enforce  
33 cooperation, but the parameter space where it is beneficial seems quite narrow. Moreover, we  
34 found that policing decays when the genetic linkage between public good and toxin production  
35 breaks. This is because policing is itself a public good, offering protection to toxin-resistant  
36 mutants that still produce public goods, yet no longer invest in toxins. Our work suggests that  
37 very specific environmental conditions are required for genetically fixed policing mechanisms  
38 to evolve in bacteria, and offers empirically testable predictions for their evolutionary stability.

## 40 **Introduction**

Cooperation, a process where individuals act to increase the fitness of others at an immediate  
42 cost to themselves, is common across the tree of life (Sachs et al. 2004; West et al. 2007b).  
While cooperation is widespread in humans (Fehr and Fischbacher 2003) and higher organisms  
44 such as insects and vertebrates (Clutton-Brock 2002; Ratnieks et al. 2006), we have only  
recently recognized that microbes also evolved adaptive cooperative behavior (West et al.  
46 2007a; Nadell et al. 2009; Ross-Gillespie and Kümmerli 2014; Cavaliere et al. 2017). Types of  
microbial cooperation include the formation of biofilms, where individuals secrete polymeric  
48 compounds to build a protective extracellular matrix (Nadell et al. 2009), the formation of  
fruiting bodies where some individuals sacrifice themselves to enable the dispersal of others  
50 (Velicer and Vos 2009); and the secretion of shareable metabolites, including proteases to digest  
nutrients (Diggle et al. 2007; Sandoz et al. 2007), siderophores to scavenge extra-cellular iron  
52 (Griffin et al. 2004; Kümmerli et al. 2010), and biosurfactants enabling group motility (de  
Vargas Roditi et al. 2013).

54  
Although cooperation is thought to provide benefits for the collective as a whole, it is  
56 intrinsically vulnerable to exploitation by cheating mutants, which benefit from the cooperative  
acts performed by others, but refrain from contributing themselves to the welfare of the group  
58 (Ghoul et al. 2014). Thus, there has been great interest in identifying mechanisms that maintain  
cooperation and prevent the invasion of cheaters (West et al. 2007b; Asfahl and Schuster 2017;  
60 Özkaya et al. 2017). Work on microbes have proved particularly useful in this context because  
cheating mutants can easily be engineered and factors important for cooperation can be  
62 experimentally manipulated in laboratory settings. Studies following this approach revealed a  
plethora of mechanisms promoting cooperation, including: (i) limited dispersal ensuring that

64 cooperators stay together (Kümmerli et al. 2009; van Gestel et al. 2014); (ii) molecular  
mechanisms allowing the recognition of other cooperators (Mehdiabadi et al. 2006; Smukalla  
66 et al. 2008; Rendueles et al. 2015); (iii) regulatory linkage between multiple traits imposing  
additional costs on cheaters (Jousset et al. 2009; Dandekar et al. 2012; Ross-Gillespie et al.  
68 2015; Mitri and Foster 2016; Popat et al. 2017); and (iv) mechanisms reducing the cost of  
cooperation such as public good recycling (Kümmerli and Brown 2010) or the use of  
70 superfluous nutrients for public goods production (Xavier et al. 2011; Sexton and Schuster  
2017).

72  
In addition, several studies suggested that bacteria have evolved policing mechanisms, which  
74 enable cooperators to directly sanction cheaters and thereby enforce cooperation (Manhes and  
Velicer 2011; Inglis et al. 2014; Wang et al. 2015; Majerczyk et al. 2016; Evans et al. 2018).  
76 For example, Wang et al. (2015) showed that in the opportunistic pathogen *Pseudomonas*  
*aeruginosa*, the synthesis of a publicly shareable protease is regulatorily coupled to the  
78 synthesis of the toxin cyanide in such a way that cheaters, deficient for protease production,  
simultaneously lose immunity against cyanide. Thus, the costly synthesis of a harmful toxin,  
80 which selectively targets non-cooperative cheaters, can be understood as a policing mechanism.  
While it seems intriguing that organisms as simple as bacteria can perform policing behavior,  
82 multiple questions regarding the evolution of microbial policing have remained unaddressed.  
For one thing, we know little about the environmental conditions promoting policing via toxin  
84 production. In this context, one would expect that the spatial structure of the environment,  
which affects the diffusion of cells, public goods and toxins, should play a crucial role (Driscoll  
86 and Pepper 2010; Inglis et al. 2011; Dobay et al. 2014). Moreover, it is unknown how potent a  
toxin must be and how much it can cost in order to efficiently fight cheaters. Finally, it remains

88 unclear whether policing is an evolutionary stable strategy or whether non-policing cooperators,  
which are immune against toxins can exploit policers as second order cheaters (Inglis et al.  
90 2014), as it is the case in higher organisms (Boyd et al. 2003).

92 Here, we address these issues by using realistic individual-based models that simulate  
interactions between cooperating, policing and cheating bacteria on a toroidal two-dimensional  
94 surface (Dobay et al. 2014). In our *in-silico* approach, bacteria are modeled as discs and seeded  
in low numbers onto the surface of their habitat, where they can consume resources, grow,  
96 divide, disperse, and secrete compounds according to specified parameters. Important to note  
is that both bacteria and public good molecules are modelled as individual agents and are free  
98 to diffuse on a continuous landscape, closely mimicking biological conditions (Figs. 1 + S1).  
For our main analysis, we considered two bacterial strains that match those used in the empirical  
100 policing paper by Wang et al. (2015). Specifically, we implemented a policing strain  $P$  that  
produces a public good together with a tightly linked toxin and an immunity protein; and a  
102 cheating strain  $C$  that is deficient for public good production and, due to the regulatory linkage,  
is also unable to produce the toxin and its immunity protein. We further considered a  
104 cooperating control wildtype strain  $W$ , which produces the public good but features no policing  
mechanism. Finally, we also considered a second-order policing cheater  $R$ , which produces the  
106 public good and the immunity protein, but not the toxin. For this strain, we assume that the  
genetic linkage between the three traits can be broken, such that  $R$  directly evolves from  $P$ .

108  
In a first set of simulations, we examined the performance of the cooperator, cheater and  
110 policing strains in monoculture to understand how the relative costs and benefits of public good  
and toxin production affect strain fitness. Next, we competed wildtype cooperators against

112 cheaters across a range of bacterial and public good diffusion coefficients to determine the  
parameter space where cooperation is favored in the absence of policing (Dobay et al. 2014).  
114 Subsequently, we competed the cheater against the policing strain across the same parameter  
space, to test whether policing extends the range of conditions across which cooperation is  
116 favored, and to identify properties of the toxin system (diffusion, potency, durability) to  
guarantee efficient policing. Finally, we simulated the situation where toxin-resistant public  
118 good producers evolve from the policing strain, and ask whether policing via toxin production  
itself constitutes an exploitable public good.

120

## Methods

### 122 *IN-SILICO* HABITAT AND BACTERIA

The *in-silico* habitat consists of a two-dimensional continuous toroidal surface, with no  
124 boundaries. The size of the surface is  $60 \times 60 \mu\text{m}^2 = 3,600 \mu\text{m}^2$ . Bacteria are modeled as discs  
with an initial radius  $r$  of  $0.5 \mu\text{m}$ . Bacteria can consume resources, which are unlimited in our  
126 system, grow at a basic growth rate  $\mu$ , and divide when reaching the threshold radius of  $1.0 \mu\text{m}$ .  
Bacteria can disperse on the landscape according to a specific cell diffusion coefficient  $D_c$   
128 ( $\mu\text{m}^2/\text{s}$ ), and are not bound to a grid, but can freely move on the continuous landscape (i.e. we  
used an off-lattice model with double-precision floating-point format). At the beginning of a  
130 simulation, we randomly seed one founder bacteria of each strain onto the surface, free to grow  
and divide according to its life cycle (see Figs. 1 + S1 for a visualization).

132

In addition to the basic growth rate  $\mu$ , the growth of a bacterium is influenced by its social  
134 behavior and its interaction with other community members. Costs, reducing growth, incur to  
individuals producing public goods, toxins and immunity proteins. Additional costs incur to

136 susceptible cells taking up toxins. The uptake of a public good, meanwhile, has a positive effect  
on growth for the beneficiary. Accordingly, the growth of our four strains  $W$  (public good  
138 producing wildtype strain),  $P$  (policing strain),  $C$  (toxin-sensitive cheating strain), and  $R$   
(second-order toxin-resistant cheater strain) are defined by the following set of functions:

140

$$G_W(t + 1) = (\mu - c_{pg} + b\sum P_j)G_W(t) \quad (1)$$

$$G_P(t + 1) = (\mu - c_{pg} - c_{tox} - c_{res} + b\sum P_j)G_P(t) \quad (2)$$

142

$$G_C(t + 1) = (\mu + b\sum P_j)(1 - (\frac{\sum T_i}{\theta_T})^\kappa)G_C(t) \quad (3)$$

$$G_R(t + 1) = (\mu - c_{pg} - c_{res} + b\sum P_j)G_R(t) \quad (4)$$

144

where  $c_{pg}$ ,  $c_{tox}$ ,  $c_{res}$  are the production costs per public good, toxin and the immunity protein,  
146 respectively. The term  $\sum P_j$  stands for the number of public goods consumed by an individual  
and  $b$  for the benefit derived from this action. The term  $\sum T_i$  represents the number of consumed  
148 toxins. Toxins decrease the overall growth rate and lead to death when they accumulate beyond  
the threshold value  $\theta_T$ . The parameter  $\theta_T$  can thus be understood as a measure of toxin potency.  
150 The negative effect toxins have on growth is further defined by the latency parameter  $\kappa$ . If  
 $\kappa = 1.0$  then there is no latency and each toxin molecule has a linear additive negative effect on  
152 growth rate (Fig. S2). With  $\kappa > 1.0$ , susceptible cells can tolerate toxins at low uptake rates,  
while the negative effects of toxins on growth accelerate with increased toxin uptake. This  
154 accounts for the common phenomenon that bacteria possess non-specific resistant mechanisms

(e.g. efflux pumps), thereby often tolerating low toxin concentrations (Fernández and Hancock  
156 2012; Nikaido and Pagès 2012).

158 The public good producing strains  $W$  and  $P$  constitutively secrete one molecule per time step,  
whereas  $P$  additionally secretes toxins at the same rate. The diffusion of cells, public goods and  
160 toxins (described by the diffusion coefficients  $D_c$ ,  $d_{pg}$  and  $d_{tox}$ , respectively) were modeled  
according to a Gaussian random walk, with a Gaussian random number generator based on the  
162 Box-Muller transform that converts uniformly distributed random numbers to normally  
distributed random numbers. Following diffusion, public goods and toxins were consumed  
164 whenever there was co-localization of molecules and cells.

166 Both, public goods and toxins were represented by points on the landscape up to the precision  
of the computer (double precision) (Figs. 1 + S1). The molecules remain in the simulation until  
168 they were either consumed or decayed. The probability of decaying was determined by a  
durability value  $\delta$  and an exponential decay function

$$P_{decay} = 1 - e^{-\omega\Delta T/\delta} \quad (5)$$

170 where  $\Delta T$  is the current lifespan of a molecule and  $\omega = 0.1$  the steepness of the decay.

172 On our off-lattice landscape, individuals can physically overlap following cell growth and  
diffusion. To remove the overlaps, we implemented a procedure where cells are moved slightly  
174 apart from each other by a random factor scaled by a maximum pulling distance. In a final step,  
our stimulation involves a life-dead-control of each individual followed by the removal of dead  
176 cells that have passed the toxin threshold value  $\theta_T$ . Fig. 2 depicts the order in which all the  
actions in our simulation were executed per time step (representing one second). This



178 simulation cycle continues until the total number of cells reaches the carrying capacity of  $K =$   
1000 cells. For each of the simulated parameter settings, we performed 50 independent  
180 replicates. At each time step, we recorded the relative strain frequency. At the end of a  
simulation, we measured the final strain frequencies, the mean time between two cell divisions,  
182 and the *per capita* public good and toxin uptake for each strain.

## 184 **EXPLORED PARAMETER SPACE**

Table 1 provides an overview of all the parameters in our simulations and the value ranges  
186 explored. One key focus of our study is to understand how cell dispersal and molecule diffusion  
affect cooperation and policing. For cell dispersal  $D_c$ , we considered active but random bacterial  
188 motility, and varied this parameter from  $0 \mu\text{m}^2/\text{s}$  (no dispersal) to  $3.5 \mu\text{m}^2/\text{s}$  (high dispersal) in  
steps of 0.5. For molecule diffusion  $d_{pg}$  and  $d_{tox}$ , we implemented passive random diffusion  
190 processes and varied parameters from  $1.0 \mu\text{m}^2/\text{s}$  (low diffusion) to  $7.0 \mu\text{m}^2/\text{s}$  (high diffusion)  
in steps of one. Another important aim of our study is to explore how toxin properties affect  
192 policing. In addition to toxin diffusion, we varied: (a) toxin durability  $\delta_{tox}$  from 50 (rapid  
decay) to 500 (intermediate decay) to 5000 (low decay) time steps; (b) toxin threshold  $\theta_T$  from  
194 600 (few molecules required to kill) to 1800 (many molecules required to kill) in steps of 400;  
and (c) toxin latency  $\kappa$  from 1.0 (low tolerance and immediate linear adverse effect) to 6.0 (high  
196 tolerance and delayed exponential adverse effect) in steps of 0.5.

198 Finally, the outcome of our simulations necessarily depends on the cost and benefit parameters.  
We implemented a basic growth  $\mu$  to ensure that all cells can grow even if they do not produce  
200 public goods. This ensures that cells can only die because of toxins and not because they  
experience negative growth.  $\mu = 1.0$  results in cell division occurring every 1,200 time steps, in

202 the absence of molecule secretion. We fixed the cost and benefit of public good production to  
 $c_{pg} = 0.001$  and  $b = 0.01$ . These values are based on our previous experience with the system  
204 (Dobay et al. 2014) and ensure that public production generates a substantial net fitness benefit,  
thus significantly reducing cell division time (see also Fig. 3). Of key interest is how costly  
206 policing ( $c_{tox+res}$ ) can be relative to  $c_{pg}$  in order to maintain a net benefit of cooperation. To  
address this question, we gradually varied the cost ratio of these two traits [ $c_{pg}/(c_{tox} + c_{res})$ ]  
208 from 0.25 to 4.0. For all simulations, we assumed  $c_{tox} = c_{res}$ .

## 210 STRAIN PERFORMANCE IN MONOCULTURE

In a first set of simulations, we assessed the performance of the strains  $W$  (wildtype cooperator)  
212  $P$  (policing cooperator) and  $C$  (public-good cheater) in monoculture. These assays allow us to  
quantify (i) the net benefit of cooperation, and (ii) the acceptable boundary costs of policing to  
214 ensure a net benefit of cooperation. A net benefit of cooperation is given when the policing  
strain  $P$  grows better than strain  $C$ , which neither produces public goods nor toxins. Because  
216 we know that cell dispersal and secreted molecule diffusion influence the efficiency of  
cooperation (Dobay et al. 2014), we performed simulations under three different diffusivity  
218 regimes, including high ( $D_c = 4.0 \mu\text{m}^2/\text{s}$ ,  $d_{pg} = d_{tox} = 7.0 \mu\text{m}^2/\text{s}$ ), medium ( $D_c = 2.0 \mu\text{m}^2/\text{s}$ ,  $d_{pg}$   
 $= d_{tox} = 3.5 \mu\text{m}^2/\text{s}$ ) and low ( $D_c = 0.1 \mu\text{m}^2/\text{s}$ ,  $d_{pg} = d_{tox} = 1.0 \mu\text{m}^2/\text{s}$ ) diffusivity. We then  
220 compared the time needed by the three strains to reach carrying capacity.

## 222 PAIRWISE STRAIN COMPETITION

We first simulated competitions between the strains  $W$  and  $C$  across the indicated range of  
224 dispersal and diffusion parameters to understand the conditions under which cooperation can  
be maintained in the absence of policing. Next, we competed  $P$  against  $C$ . In this scenario,  $C$

226 can still exploit the public good produced by  $P$ , but at the same time is harmed by the toxins  
secreted by this opponent. In a first set of simulations, we implemented intermediate default  
228 toxin properties ( $d_{tox} = 4.0 \mu\text{m}^2/\text{s}$ ,  $\delta_{tox} = 500 \text{ s}$ ,  $\theta_T = 1000$ , and  $\kappa = 3.5$ ) to examine whether  
policing extends the range of conditions across which cooperation is favored. In a second set of  
230 simulations, we then individually manipulated each of the four different toxin properties to  
identify the features required for toxin-mediated policing to be efficient.

232

### THREE-WAY STRAIN INTERACTIONS

234 To examine what happens when the genetic linkage between cooperation and policing breaks,  
we performed three-way competitions between strains  $P$ ,  $C$ , and  $R$ . The latter strain no longer  
236 produces the toxin, but is resistant to it. Because we do not necessarily expect an overall winner  
in these competitions, as strain frequency could potentially follow cyclical patterns (Kerr et al.  
238 2002), we extended our simulation code by implementing a random cell removal event, which  
is activated as soon as more than 30 % of the surface is covered with cells. This allowed us to  
240 keep population size at roughly  $K/2$ , and to follow strain frequency over extended periods of  
time (i.e. 80,000 time steps).

242

## Results

### 244 STRAIN PERFORMANCE IN MONOCULTURE

The growth of strain  $C$  (neither producing public goods nor toxins) was not affected by the  
246 diffusivity of the environment, and was solely determined by the basic growth rate  $\mu$ , reaching  
carrying capacity after 12,000 time steps (Fig. 3). Strain  $W$  (producing public goods) grew  
248 significantly better than  $C$ , demonstrating the benefit of public goods cooperation. The growth  
of this strain was reduced in more diffusive environments, where the likelihood of public good

250 sharing and consumption declines. The performance of strain  $P$  (producing toxins in addition  
to public goods) greatly varied both in response to the relative costs of policing and the  
252 diffusivity of the environment. In environments characterized by low diffusion,  $P$  always  
outperformed  $C$  even when the cost of toxin production was four times higher than the cost of  
254 public good production (triangles in Fig. 3). This was no longer the case in environments  
characterized by intermediate (diamonds in Fig. 3) or high diffusivity (dots in Fig. 3), where  $P$   
256 only grew better than  $C$  when toxins were cheaper than public goods. If this condition was not  
met, then the high costs of policing combined with reduced public good consumption decreased  
258 cell growth to a point that prevented populations from reaching carrying capacity.

260 Interestingly, the relationship between the cost ratio  $c_{pg}/(c_{tox} + c_{res})$  and the time needed to  
reach carrying capacity ( $\tau_K$ ) was best captured by the Monod equation (Monod 1949), a  
262 hyperbolic equation initially used to explain the exponential growth rate as a function of nutrient  
concentration. Applied to our system, we found that the function

$$R(\tau_K) = R_K \frac{\tau_K}{R_\tau + \tau_K}, \quad (6)$$

264 provides a fair approximation to relate  $r$  to  $\tau_K$ , where  $R_K$  represents the ratio limit for reaching  
carrying capacity and  $R_\tau$  the time at which the carrying capacity is half the maximum (Fig. S3).

266

### LOW CELL DISPERSAL FAVORS COOPERATION WITHOUT POLICING

268 When competing  $W$  against  $C$  without a policing mechanism in place, cooperation was only  
strongly favored when cells did not disperse (Fig. 4A). In other words, if cooperator cells grew  
270 as microcolonies, physically separated from the cheaters, then efficient public good sharing  
among cooperators is promoted. We further found that cooperators and cheaters could coexist

272 when cell and public good diffusion was low, but greater than zero (Fig. 4A). Under all other  
conditions, cheaters strongly dominated the community and pushed cooperators to very low  
274 frequencies. These results are in line with our previous simulations, showing that there is only  
a narrow parameter space within which public good cooperation is favored (Dobay et al. 2014).

276

## 278 **TOXIN-MEDIATED POLICING HAS POSITIVE AND NEGATIVE EFFECTS FOR COOPERATION**

The introduction of a policing mechanism, which operates via the secretion of a toxin that  
280 selectively targets cheaters, had multiple dramatic effects on the competitive outcome between  
the cheater  $C$  and the cooperating policer  $P$  (Fig. 4B). Policing strongly increased selection for  
282 cooperation under conditions where cooperators could previously only coexist with cheaters  
(compare Fig. 4A and 4B for combinations of low public good diffusion and cell dispersal).  
284 This finding demonstrates that policing can indeed extend the parameter space across which  
cooperation is favored. Conversely, we found that policing also had negative effects and  
286 drastically accelerated selection against cooperation, especially under conditions where  
cheaters previously experienced only a moderate selective advantage (compare Fig. 4A and 4B  
288 for combinations of intermediate public good diffusion and cell dispersal). These two opposing  
effects led to a sharp transition between conditions that either completely favor  $P$  or  $C$ , leaving  
290 very few conditions where coexistence between the two strains is possible.

## 292 **HOW TOXIN PROPERTIES AFFECT POLICING EFFICIENCY**

We found that higher toxin diffusion  $d_{tox}$  significantly increased selection for cooperation (Fig.  
294 5A, 5E and 5B), especially under conditions of intermediate public good diffusion and cell  
dispersal. These results show that policing is particularly efficient when toxins are sent away to

296 target more distant competitors whilst keeping the public good more local for preferential  
sharing among producers. Our simulations further revealed that high toxin durability  $\delta_{tox}$   
298 increases policing efficiency and thus selection for cooperation (Fig. 5C, 5E, 5D). These  
findings can be explained by the fact that more durable toxins are more likely to reach target  
300 cells. Next, we examined the role of toxin potency  $\theta_T$  (i.e. the number of toxins needed to kill  
a target cell), and found that high potency is crucial for policing to promote cooperation (Fig.  
302 5F, 5E, 5G). While this finding seems trivial at first sight, the dramatic effects we observed  
when decreasing toxin potency are remarkable. For instance, a reduction of toxin potency by  
304 45 % (from  $\theta_T = 1000$  to  $= 1800$ ) already completely negated any benefit of policing, and even  
increased the parameter space across which cooperation was selected against. Finally, we  
306 explored the role of toxin latency  $\kappa$  for policing. Toxin latency is a measure of target cell  
tolerance: with low values of  $\kappa$ , the fitness of target cells is immediately affected in a linear  
308 way, whereas large values of  $\kappa$  mean that target cells can tolerate a certain level of toxins and  
negative effects only kick in later, but accelerate with higher toxin uptake rates (Figs. S2). We  
310 found that low  $\kappa$  values dramatically increased the efficiency of policing and selection for  
cooperation (Fig. 5H, 5E, 5I).

312

## **POLICING GOES EXTINCT WHEN THE GENETIC LINKAGE BETWEEN TRAITS**

### **314 BREAKS**

Next, we simulated the case where the genetic linkage between cooperation and policing breaks.  
316 Specifically, we studied the performance of strain  $R$ , which evolved directly from  $P$  by losing  
toxin production but keeping resistance, in competition with  $P$  and  $C$  across a range of  
318 intermediate environmental diffusivities. We found that the presence of  $R$  consistently drove  $P$   
to extinction under all environmental conditions tested (Fig. 6). Our simulations, which kept

320 populations at half the carrying capacity ( $K/2 \sim 500$  cells) for an extended period of time  
(roughly 10 times longer than in the previous pairwise competition assays), allowed us to  
322 distinguish three distinct competition phases. The first phase comprises the time frame in which  
the community grows from three cells to  $K/2$ . During this phase, we observed cyclical  
324 fluctuations of strain frequencies with a general tendency for  $C$  to increase,  $P$  to decrease, and  
 $R$  to remain stable. The cyclical patterns observed here are reminiscent of the rock-paper-  
326 scissors dynamics described by previous studies on bacterial social interactions (Kerr et al.  
2002; Kelsic et al. 2015; Inglis et al. 2016), where strains chasing each other in non-transitive  
328 interactions in circles with no overall winner. The second phase was characterized by a  
pronounced dip in  $C$  frequency accompanied by a strong increase in  $R$  frequency, and a  
330 moderate increase in  $P$  frequency in eight of the nine diffusion conditions (Fig. 6). This pattern  
is most likely explained by the accumulation of toxins in the environment, which efficiently  
332 suppressed  $C$ , but at the same time gave  $R$  leverage, as it could benefit from the effect of  
policing without paying the cost for it. During the third phase, we observed the extinction of  $P$ ,  
334 the concomitant recovery of  $C$  followed by a decrease of  $R$  (Fig. 6). These patterns arise because  
as  $P$  decreases, toxin concentration declines allowing the recovery of  $C$ , which then efficiently  
336 exploit the public goods produced by  $R$ . In all cases, our simulations returned to a simple  
cooperator-cheater scenario, with the relative success of the two strategies being determined by  
338 the diffusivity of the environment (similar to the results in Fig. 4A).

## 340 **Discussion**

Understanding how policing can repress competition and foster cooperation in social groups of  
342 higher organisms has attracted the attention of evolutionary biologists for decades (Clutton-  
Brock and Parker 1995; Frank 1995, 2003; West et al. 2007b; Ratnieks and Wenseleers 2008;  
344 Kümmerli 2011; Raihani et al. 2012; Cant et al. 2013). Here, we explored whether policing

could also be an effective way to enforce cooperation in groups of microbes, sharing beneficial  
346 public goods. In our models, policing is exerted via the secretion of a toxin that specifically  
targets cheater cells, which do not contribute to the pool of public goods. Our simulations reveal  
348 that policing is most conducive under conditions of intermediate cell dispersal and public good  
diffusion, where it can extend the parameter space, under which cooperation is favored. We  
350 further found that an effective policing mechanism entails a toxin that is: (i) cheaper to produce  
than the public good; (ii) more diffusible than the public good in order to effectively reach  
352 cheaters; (iii) durable; and (iv) potent in killing. However, our simulations also reveal two major  
downsides of policing. First, policing can accelerate the loss of cooperation under conditions  
354 where cheaters and cooperators can coexist in the absence of policing. This leads to a sharp  
state transition between conditions where policing either favors or disfavors cooperation.  
356 Second, policing is selected against if the genetic linkage between public good and the toxin-  
anti-toxin production can be broken. If this occurs then toxin-resistant mutants that produce  
358 public goods, but no longer contribute to toxin production, derail policing, showing that  
microbial policing itself constitutes an exploitable public good (Inglis et al. 2014).

360

Several studies have recently proposed toxin-based policing mechanisms to keep cheaters in  
362 check (Inglis et al. 2014; Wang et al. 2015; Majerczyk et al. 2016; Evans et al. 2018). While  
the idea of bacteria being able to punish cheating community members is exciting, our  
364 simulations reveal that the ecological spectrum under which policing can be favored is actually  
quite narrow. For one thing, we found that policing is not required when environmental  
366 diffusivity is low, conditions that promote cooperation *per se*. The reason for this is that low  
public good diffusion and low bacterial dispersal lead to significant spatial segregation of  
368 strains within bacterial community, which promotes the local sharing of public goods among



cooperators (Kümmerli et al. 2009; Julou et al. 2013; Mitri and Foster 2013; van Gestel et al.  
370 2014; Weigert and Kümmerli 2017). Moreover, we show that policing is not favorable when  
environmental diffusivity is high, conditions that break any spatial association between  
372 cooperators and their public goods. Toxin-mediated policing is detrimental here because: (i)  
cheaters can freely exploit public goods; (ii) many toxins get lost due to the high diffusion, and  
374 thus never reach their targets; (iii) and the high level of cell mixing reduces the efficiency and  
selectivity of policing, as cooperators are hit by toxins as often as cheaters (Inglis et al. 2011).  
376 Overall, it turns out that intermediate levels of environmental diffusivity proved most beneficial  
for policing. The issue with this relatively narrow parameter space is that environmental  
378 diffusivity is likely to vary both temporally and spatially under natural conditions, which could  
quickly shift the selective balance for or against policing. It thus remains to be seen whether  
380 policing can indeed evolve under fluctuating environmental conditions.

382 Another important point that has received little attention so far concerns the question whether  
the reported policing mechanisms have indeed evolved for this very purpose or whether they  
384 represent by-products of regulatory linkage of traits for other reasons than policing (West et al.  
2007c). For instance, in the case of *P. aeruginosa* it is well conceivable that cyanide primarily  
386 serves as a broad-spectrum toxin to target inter-specific competitors under high cell density  
(Bernier et al. 2016). This might be the reason why the expression of cyanide is controlled by  
388 quorum sensing, and why it is regulatorily linked to other public good traits, such as protease  
production, whose expression is also controlled in a density-dependent manner (Darch et al.  
390 2012). Consequently, the observed cyanide-mediated policing exerted by wildtype strains on  
protease-deficient strains could be a mere by-product of this regulatory linkage. Alternatively,  
392 it is also possible that an initial co-incidental regulatory linkage between cyanide and protease

later proved useful as a policing mechanism and evolved as such through cooption (Foster  
394 2011). Clearly, further research is needed to uncover the evolutionary history of these putative  
policing mechanisms, and care must be taken to distinguish between mechanistic (proximate)  
396 and evolutionary (ultimate) explanation of observed behavioral patterns (West et al. 2007c).

398 The potential policing mechanisms reported for microbes and the one implemented in our  
simulations differ in one important aspect from the policing systems found in higher organisms.  
400 Specifically, the difference is that the microbial policing mechanisms are genetically fixed (i.e.  
strains are either cooperating policers or cheaters), whereas in higher organisms policing is  
402 perceived as a conditional strategy, which can be applied to sanction cheaters only if required  
(Clutton-Brock and Parker 1995; Frank 1995, 2003; Kiers et al. 2003; West et al. 2007b;  
404 Ratnieks and Wenseleers 2008; Kümmerli 2011; Raihani et al. 2012). In the latter scenario,  
individuals can take decisions on whether to cheat or to cooperate, and whether to impose  
406 sanctions or not. In certain cases, it was found that the mere threat of policing was sufficient to  
coerce individuals to cooperate and prevent cheating in the first place (Wenseleers and Ratnieks  
408 2006; Kümmerli 2011; Cant et al. 2013). Microbes clearly lack cognitive abilities for such  
conditional behaviors, and it is thus not surprising that cheating, cooperating and policing  
410 strategies are genetically fixed in these organisms. Nonetheless, we argue that it seems fair to  
use the term ‘policing’ for the reported behaviors, but also to keep in mind the difference  
412 between conditional and fixed strategies.

414 In summary, our work contributes to the development of an evolutionary concept for policing  
in microbial systems. It shows how ecological factors, in particular the diffusivity of the  
416 environment, interact with the properties of a toxin-mediated policing system, to define the

parameter space in which policing can be favored. It further demonstrates how realistic  
418 individual-based modelling, tracking both cells and their public goods over time and across  
space, can be used to deepen our understanding of social interactions in microbes.

420

### **AUTHOR CONTRIBUTIONS**

422 T. W., R. K. and A. D. conceived the study. T. W. and A. D. constructed the model. T. W.  
performed the simulations. T. W., R. K. and A. D. analyzed the data and wrote the paper.

424

### **ACKNOWLEDGMENTS**

426 We thank Barbara König and Marta Manser for comments, the Services and Support for Science  
IT (S3IT) at the University of Zurich for technical support with the simulations on the  
428 ScienceCloud, and the Swiss National Science Foundation (grant no. PP00P3-139164) and the  
European Research Council (ERC-CoG grant no. 681295) for funding. The authors declare no  
430 conflict of interest with this manuscript.

432

### **LITERATURE CITED**

434 Asfahl, K. L. and M. Schuster. 2017. Social interactions in bacterial cell-cell signaling. *FEMS  
Microbiolol. Ecol.* 41:92-107.

436 Bernier, S. P., M. L. Workentine, X. Li, N. A. Magarvey, G. A. O'Toole, and M. G. Surette.  
2016. Cyanide toxicity to *Burkholderia cenocepacia* is modulated by polymicrobial  
438 communities and environmental factors. *Front. Microbiol.* 7:1-14.

Boyd, R., H. Gintis, S. Bowles, and P. J. Richerson. 2003. The evolution of altruistic  
440 punishment. *Proc. Natl. Acad. Sci. U.S.A.* 100:3531-3535.

Cant, M. A., H. J. Nichols, R. A. Johnstone, and S. J. Hodge. 2013. Policing of reproduction by  
442 hidden threats in a cooperative mammal. *Proc. Natl. Acad. Sci. U.S.A.* 111:326-330.

- Cavaliere, M., S. Feng, O. S. Soyer, and J. I. Jimenez. 2017. Cooperation in microbial  
444 communities and their biotechnological applications. *Environ. Microbiol.* 19:2949-  
2963.
- 446 Clutton-Brock, T. H. 2002. Breeding together: kin selection and mutualism in cooperative  
vertebrates. *Science* 296:69-72.
- 448 Clutton-Brock, T. H. and G. A. Parker. 1995. Punishment in animal societies. *Nature* 373:209-  
216.
- 450 Dandekar, A. A., S. Chugani, and E. P. Greenberg. 2012. Bacterial quorum sensing and  
metabolic incentives to cooperate. *Science* 338:264-266.
- 452 Darch, S. E., S. A. West, K. Winzer, and S. P. Diggle. 2012. Density-dependent fitness benefits  
in quorum-sensing bacterial populations. *Proc. Natl. Acad. Sci. U.S.A.* 109:8259-8263.
- 454 de Vargas Roditi, L., K. E. Boyle, and J. B. Xavier. 2013. Multilevel selection analysis of a  
microbial social trait. *Mol. Syst. Biol.* 9:684.
- 456 Diggle, S. P., A. S. Griffin, G. S. Campell, and S. A. West. 2007. Cooperation and conflict in  
quorum-sensing bacterial populations. *Nature* 450:411-414.
- 458 Dobay, A., H. C. Bagheri, A. Messina, R. Kümmerli, and D. J. Rankin. 2014. Interaction effects  
of cell diffusion, cell density and public goods properties on the evolution of cooperation  
460 in digital microbes. *J. Evol. Biol.* 27:1869-1877.
- Driscoll, W. W. and J. W. Pepper. 2010. Theory for the evolution of diffusible external goods.  
462 *Evolution* 64:2682-2687.
- Evans, K. C., S. Benomar, L. A. Camuy-Vélez, E. B. Nasser, X. Wang, B. Neuenswander, and  
464 J. R. Chandler. 2018. Quorum-sensing control of antibiotic resistance stabilizes  
cooperation in *Chromobacterium violaceum*. *ISME J.* in press.
- 466 Fehr, E. and U. Fischbacher. 2003. The nature of human altruism. *Nature* 425:785- 791.
- Fernández, L. and R. E. W. Hancock. 2012. Adaptive and mutational resistance: role of porins  
468 and efflux pumps in drug resistance. *Clin. Microbiol. Rev.* 25:661-681.
- Foster, K. 2011. The sociobiology of molecular systems. *Nat. Rev. Genet.* 12:193-203.
- 470 Frank, S. A. 1995. Mutual policing and repression of competition in the evolution of  
cooperative groups. *Nature* 377:520-522.
- 472 Frank, S. A. 2003. Perspective: repression of competition and the evolution of cooperation.  
*Evolution* 57:693-705.

- 474 Ghoul, M., A. S. Griffin, and S. A. West. 2014. Toward an evolutionary definition of cheating.  
Evolution 68:318-331.
- 476 Griffin, A., S. A. West, and A. Buckling. 2004. Cooperation and competition in pathogenic  
bacteria. Nature 430:1024-1027.
- 478 Inglis, R. F., J. M. Biernaskie, A. Gardner, and R. Kümmerli. 2016. Presence of a loner strain  
maintains cooperation and diversity in well-mixed bacterial communities. Proc. R. Soc.  
480 B 283:20152682.
- Inglis, R. F., P. G. Roberts, A. Gardner, and A. Buckling. 2011. Spite and the scale of  
482 competition in *Pseudomonas aeruginosa*. Am. Nat. 178:276-285.
- Inglis, R. F., S. West, and A. Buckling. 2014. An experimental study of strong reciprocity in  
484 bacteria. Biol. Lett. 10:20131069.
- Jousset, A., L. Rochat, M. Péchy-Tarr, C. Keel, S. Scheu, and M. Bonkowski. 2009. Predators  
486 promote defence of rhizosphere bacterial populations by selective feeding on non-toxic  
cheaters. ISME J. 3:666-674.
- 488 Julou, T., T. Mora, L. Guillon, V. Croquette, I. J. Schalk, D. Bensimon, and N. Desprat. 2013.  
Cell-cell contacts confine public goods diffusion inside *Pseudomonas aeruginosa*  
490 clonal microcolonies. Proc. Natl. Acad. Sci. U.S.A. 110:12577-12582.
- Kelsic, E. D., J. Zhao, K. Vetsigian, and R. Kishony. 2015. Counteraction of antibiotic  
492 production and degradation stabilizes microbial communities. Nature 521:516-519.
- Kerr, B., M. A. Riley, M. W. Feldman, and B. J. M. Bohannan. 2002. Local dispersal promotes  
494 biodiversity in a real-life game of rock-paper-scissors. Nature 418:171-174.
- Kiers, E. T., R. A. Rousseau, S. A. West, and R. F. Denison. 2003. Host sanctions and the  
496 legume-rhizobium mutualism. Nature 425:78-81.
- Kümmerli, R. 2011. A test of evolutionary policing theory with data from human societies.  
498 PLoS One 6:e24350.
- Kümmerli, R. and S. P. Brown. 2010. Molecular and regulatory properties of a public good  
500 shape the evolution of cooperation. Proc. Natl. Acad. Sci. U.S.A. 107:18921-18926.
- Kümmerli, R., A. S. Griffin, S. A. West, A. Buckling, and F. Harrison. 2009. Viscous medium  
502 promotes cooperation in the pathogenic bacterium *Pseudomonas aeruginosa*. Proc. R.  
Soc. B 276:3531-3538.

- 504 Kümmerli, R., P. van den Berg, A. S. Griffin, S. A. West, and A. Gardner. 2010. Repression of  
competition promotes cooperation: experimental evidence from bacteria. *J. Evol. Biol.*  
506 23:699-706.
- Majerczyk, C., E. Schneider, and E. P. Greenberg. 2016. Quorum sensing control of Type VI  
508 secretion factors restricts the proliferation of quorum-sensing mutants. *eLife* 5:e14712.
- Manhes, P. and G. J. Velicer. 2011. Experimental evolution of selfish policing in social bacteria.  
510 *Proc. Natl. Acad. Sci. U.S.A.* 108:5357-5362.
- Mehdiabadi, N. J., C. N. Jack, T. T. Farnham, T. G. Platt, S. E. Kalla, G. Shaulsky, D. C.  
512 Queller, and J. E. Strassmann. 2006. Kin preferences in a social microbe. *Nature*  
442:881-882.
- 514 Mitri, S. and K. R. Foster. 2013. The genotypic view of social interactions in microbial  
communities. *Annu. Rev. Genet.* 47:247-273.
- 516 Mitri, S. and K. R. Foster. 2016. Pleiotropy and the low cost of individual traits promote  
cooperation. *Evolution* 70:488-494.
- 518 Monod, J. 1949. The growth of bacterial cultures. *Annu. Rev. Microbiol.* 3:371-394.
- Nadell, C. D., J. B. Xavier, and K. R. Foster. 2009. The sociobiology of biofilms. *FEMS*  
520 *Microbiol. Rev.* 33:206-224.
- Nikaido, H. and J.-M. Pagès. 2012. Broad-specificity efflux pumps and their role in multidrug  
522 resistance of Gram-negative bacteria. *FEMS Microbiol. Rev.* 36:340-363.
- Özkaya, Ö., K. B. Xavier, F. Dionisio, and R. Balbontin. 2017. Maintenance of microbial  
524 cooperation mediated by public goods in single and multiple traits scenarios. *J.*  
*Bacteriol.*
- 526 Popat, R., F. Harrison, A. C. da Silva, S. A. Easton, L. McNally, P. Williams, and S. P. Diggle.  
2017. Environmental modification via a quorum sensing molecule influences the social  
528 landscape of siderophore production. *Proc. R. Soc. B* 284.
- Raihani, N. J., A. Thornton, and R. Bshary. 2012. Punishment and cooperation in nature. *Trends*  
530 *Ecol. Evol.* 27:288-295.
- Ratnieks, F. L. W., K. R. Foster, and T. Wenseleers. 2006. Conflict resolution in insect  
532 societies. *Annu. Rev. Entomol.* 51:581-608.
- Ratnieks, F. L. W. and T. Wenseleers. 2008. Altruism in insect societies and beyond: voluntary  
534 or enforced? *Trends Ecol. Evol.* 23:45-52.

- Rendueles, O., P. C. Zee, I. Dinkelacker, M. Amherd, S. Wielgoss, and G. J. Velicer. 2015.  
536 Rapid and widespread de novo evolution of kin discrimination. *Proc. Natl. Acad. Sci.*  
U.S.A. 112:9076-9081.
- 538 Ross-Gillespie, A., Z. Dumas, and R. Kümmerli. 2015. Evolutionary dynamics of interlinked  
public goods traits: an experimental study of siderophore production in *Pseudomonas*  
540 *aeruginosa*. *J. Evol. Biol.* 28:29-39.
- Ross-Gillespie, A. and R. Kümmerli. 2014. Collective decision-making in microbes. *Front.*  
542 *Microbiol.* 5:54.
- Sachs, J. L., U. G. Mueller, T. P. Wilcox, and J. J. Bull. 2004. The evolution of cooperation. *Q.*  
544 *Rev. Biol.* 79:135-160.
- Sandoz, K. M., S. M. Mitzimberg, and M. Schuster. 2007. Social cheating in *Pseudomonas*  
546 *aeruginosa* quorum sensing. *Proc. Natl. Acad. Sci. U.S.A.* 104:15876-15881.
- Sexton, D. J. and M. Schuster. 2017. Nutrient limitation determines the fitness of cheaters in  
548 bacterial siderophore cooperation. *Nat. Commun.* 8:230.
- Smukalla, S., M. Caldara, N. Pochet, A. Beauvais, S. Guadagnini, C. Yan, M. D. Vinces, A.  
550 Jansen, M. C. Prevost, J.-P. Latgé, G. R. Fink, K. R. Foster, and K. J. Verstrepen. 2008.  
*FLO1* Is a variable green beard gene that drives biofilm-like cooperation in budding  
552 yeast. *Cell* 135:726-737.
- van Gestel, J., F. J. Weissing, O. P. Kuipers, and A. T. Kovács. 2014. Density of founder cells  
554 affects spatial pattern formation and cooperation in *Bacillus subtilis* biofilms. *ISME J.*  
8:2069-2079.
- 556 Velicer, G. J. and M. Vos. 2009. Sociobiology of the *Myxobacteria*. *Annu. Rev. Microbiol.*  
63:599-623.
- 558 Wang, M., A. L. Schaefer, A. A. Dandekar, and E. P. Greenberg. 2015. Quorum sensing and  
policing of *Pseudomonas aeruginosa* social cheaters. *Proc. Natl. Acad. Sci. U.S.A.*  
560 112:201500704.
- Weigert, M. and R. Kümmerli. 2017. The physical boundaries of public goods cooperation  
562 between surface-attached bacterial cells. *Proceedings of the Royal Society B: Biological*  
*Sciences* 284:20170631.
- 564 Wenseleers, T. and F. L. W. Ratnieks. 2006. Enforced altruism in insect societies. *Nature*  
444:50.

- 566 West, S. A., S. P. Diggle, A. Buckling, A. Gardner, and A. S. Griffin. 2007a. The social lives  
of microbes. *Annu. Rev. Ecol. Evol. Syst.* 38:53-77.
- 568 West, S. A., A. S. Griffin, and A. Gardner. 2007b. Evolutionary explanations for cooperation.  
*Curr. Biol.* 17:R661-R672.
- 570 West, S. A., A. S. Griffin, and A. Gardner. 2007c. Social semantics: altruism, cooperation,  
mutualism, strong reciprocity and group selection. *J. Evol. Biol.* 20:415-432.
- 572 Xavier, J. B., W. Kim, and K. R. Foster. 2011. A molecular mechanism that stabilizes  
cooperative secretions in *Pseudomonas aeruginosa*. *Mol. Microbiol.* 79:166-179.
- 574



Table 1

| Item        | Parameter           | Description                | Range                                  |
|-------------|---------------------|----------------------------|----------------------------------------|
| Cell        | $r$                 | radius                     | 0.5 - 1 $\mu\text{m}$                  |
|             | $D_c$               | dispersal                  | 0 - 3.5 $\mu\text{m}^2\text{s}^{-1}$   |
|             | $\mu$               | growth rate                | 1.0                                    |
| Public good | $p_{pg}$            | production rate            | 1.0 $\text{s}^{-1}$                    |
|             | $c_{pg}$            | production cost            | 0.001                                  |
|             | $b$                 | benefit                    | 0.01                                   |
|             | $d_{pg}$            | diffusion                  | 1.0 – 7.0 $\mu\text{m}^2\text{s}^{-1}$ |
|             | $\delta_{pg}$       | durability                 | 500 s                                  |
| Toxin       | $p_{tox}$           | production rate            | 1.0 $\text{s}^{-1}$                    |
|             | $c_{tox} + c_{res}$ | production & immunity cost | 0.00025 - 0.004*                       |
|             | $c_{tox}$           | production cost            | 0.0003 $\dagger$                       |
|             | $c_{res}$           | immunity cost              | 0.0003 $\dagger$                       |
|             | $d_{tox}$           | diffusion                  | 1.0 – 7.0 $\mu\text{m}^2\text{s}^{-1}$ |
|             | $\delta_{tox}$      | durability                 | 50 - 5000 s                            |
|             | $\theta_T$          | potency                    | 600 - 1800                             |
|             | $\kappa$            | latency                    | 1 – 6                                  |

576

\* varied in the simulations shown in Fig. 3.

578  $\dagger$  based on the simulations shown in Fig. 3,  $c_{tox}$  and  $c_{res}$  were fixed to these values for all subsequent analyses.

580

## FIGURES

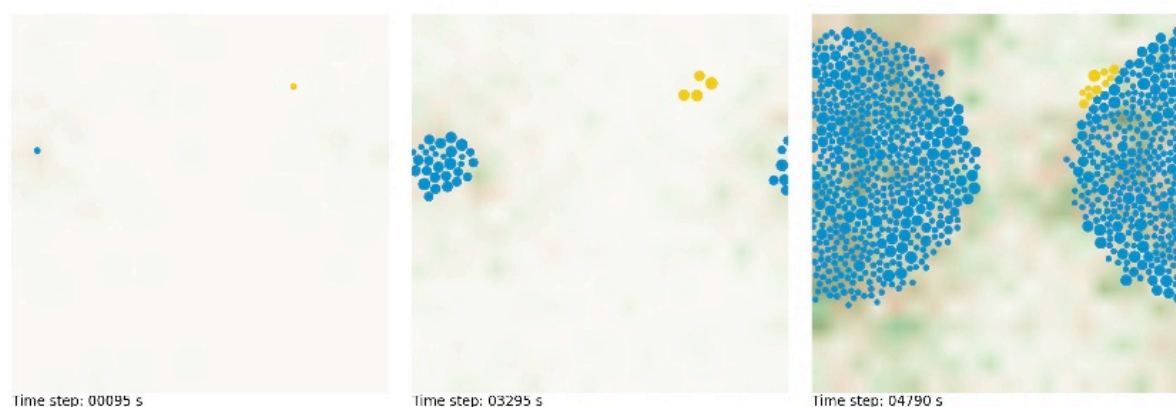

**Figure 1.** Point-in-time snapshots showing the spatial distribution of cooperating policers (in blue) and cheaters (in yellow) during competition. The point-in-time snapshots were taken during the early, intermediate and late simulation phase, depicting the growth of digital bacteria in their simulated environment. The density of public goods (in green) and toxins (in red) produced by the cooperating policers are indicated by the intensity level of their respective color. The specific parameters values for this example are:  $D_c = 0.0 \mu\text{m}^2/\text{s}$ ,  $d_{\text{pg}} = 1.0 \mu\text{m}^2/\text{s}$ ,  $d_{\text{tox}} = 2.0 \mu\text{m}^2/\text{s}$ ,  $\delta_{\text{tox}} = 500 \text{ s}$ ,  $\theta_T = 1000$  and  $\kappa = 3.5$ .

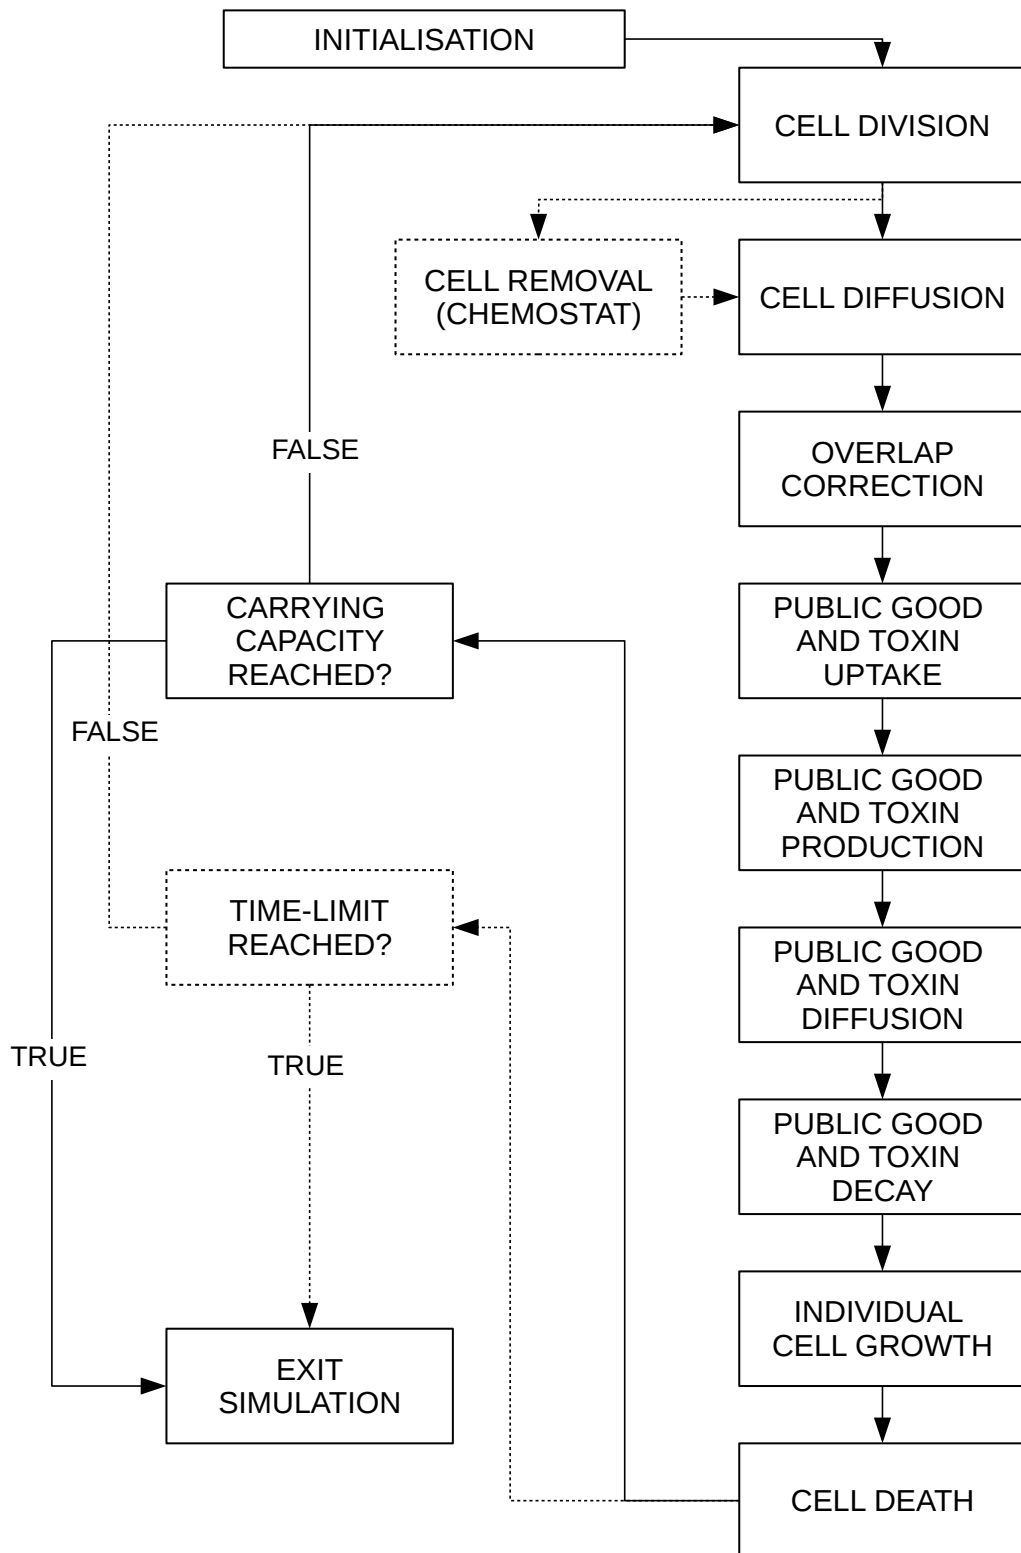

**Figure 2.** Flow diagram of the computer simulation showing the order of each procedure called during a single time step (i.e. one second). Our platform allows for two different types of culturing conditions: batch-culture growth, where simulations stop when populations reach the carrying capacity  $K = 1000$  (solid lines); and continuous growth in a chemostat, where simulations stop after a given time period (dashed lines). To guarantee continuous growth, the chemostat cycle comprised a random cell removal mechanism, such that population size was kept constant at  $K/2$ . Each box describes a key element in a cell's life cycle, affecting its fitness: i.e. cells grew according their fitness equations (see main text) and divided when reaching the threshold radius of  $1 \mu\text{m}$  (two times the initial radius). Since cells are free to move on a continuous landscape, they can overlap following diffusion. To remove cell overlap, we used a procedure based on the physics of hard-core interactions used in molecular dynamics and cell elasticity.

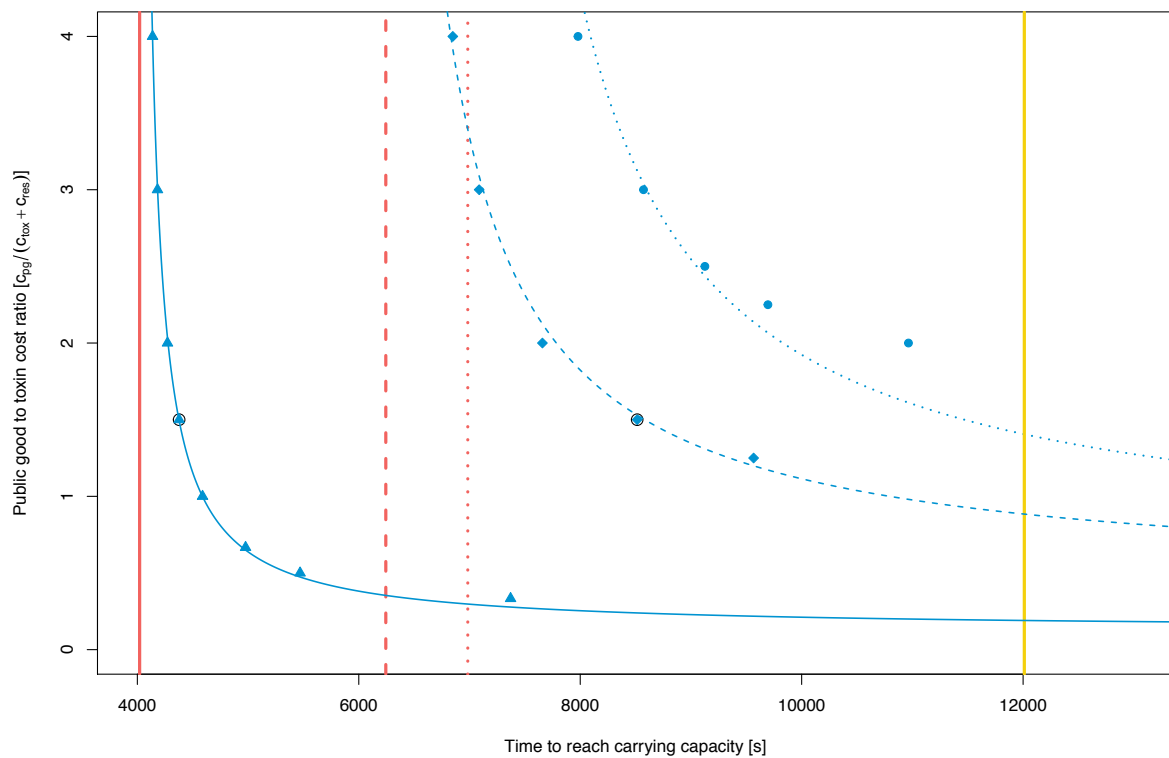

**Figure 3.** Growth in monoculture and the relative cost of policing. We examined how large the cost of policing ( $c_{tox} + c_{res}$ ) can be relative to the cost of public good production ( $c_{pg}$ ) to guarantee a net benefit of cooperation. To address this question, we compared the growth of the policing strain (producing toxins and public goods, in blue) with the growth of the cooperator strain (producing only public goods, in red) and the cheater strain (producing neither toxins nor public goods, in yellow) in monoculture for a range of cost ratios, under three different diffusion regimes. The yellow bar indicates that the time needed by the cheater strain to reach carrying capacity was not affected by the diffusivity of the environment. The red bars show that the time needed by the cooperator strain to reach carrying capacity increased with higher diffusivity of the environment (plain line: low diffusivity,  $D_c = 0.0 \mu\text{m}^2/\text{s}$ ,  $d_{pg} = d_{tox} = 1.0 \mu\text{m}^2/\text{s}$ ; dashed line: intermediate diffusivity,  $D_c = 2.0 \mu\text{m}^2/\text{s}$ ,  $d_{pg} = d_{tox} = 3.5 \mu\text{m}^2/\text{s}$ ; dotted line: high diffusivity,  $D_c = 4.0 \mu\text{m}^2/\text{s}$ ,  $d_{pg} = d_{tox} = 7.0 \mu\text{m}^2/\text{s}$ ). For policing to evolve, the time needed by the policer strain to reach carrying capacity must be within these boundaries (low diffusivity: blue triangles; intermediate diffusivity: diamonds, high diffusivity: dots). Values represent averages of 50 independent simulations. Standard errors of the mean are smaller than the size of the markers and therefore not shown. We set  $c_{pg} = 0.001$ , while varying  $c_{tox} + c_{res}$  from 0.00025 to 0.004. The black encircled values correspond to  $c_{pg}/(c_{tox} + c_{res}) = 1.5$ , the relative policing cost used for all subsequent simulations.

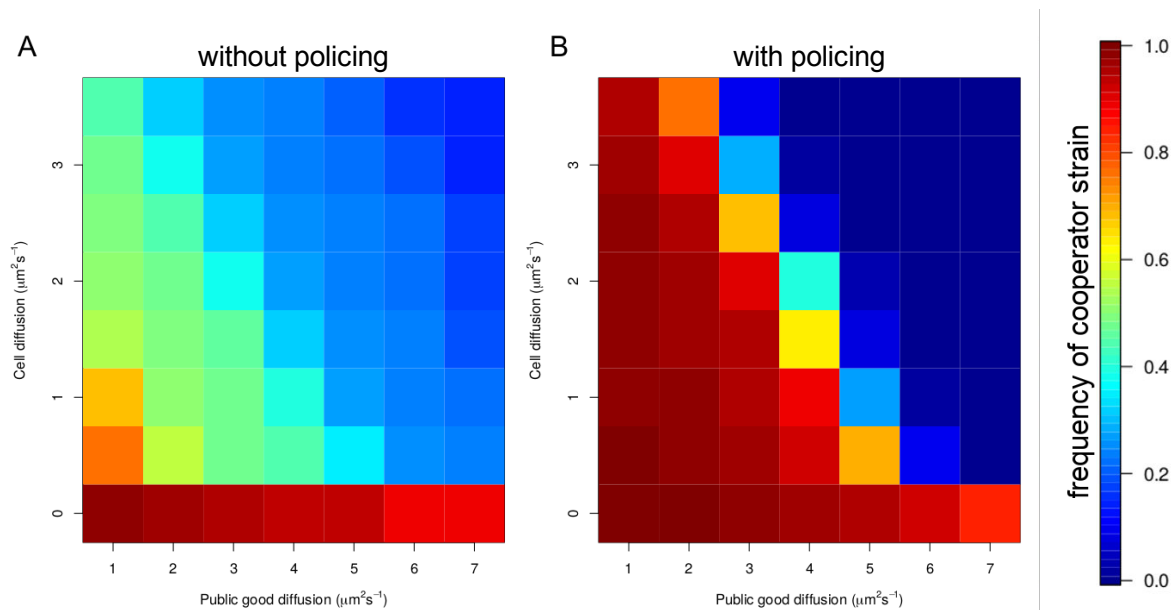

**Figure 4.** Competition between cheaters and cooperators across a range of cell dispersal  $D_c$  and public good diffusion  $d_{pg}$  coefficients. Heat maps depict the frequency of the cooperator strain after the community reached stationary phase. (A) Outcome of competitions between the public-good-producing cooperator  $W$  and the cheater  $C$  in the absence of a policing mechanism. (B) Outcome of competitions between the policing cooperator  $P$  and the cheater  $C$ .  $D_c$  varied from 0.0 to  $3.5 \mu\text{m}^2/\text{s}$ , whereas  $d_{pg}$  varied from 1.0 -  $7.0 \mu\text{m}^2/\text{s}$ . The other parameters were set to intermediate values:  $d_{tox} = 4.0 \mu\text{m}^2/\text{s}$ ,  $\delta_{tox} = 500$  s,  $\theta_T = 1000$ ,  $\kappa = 3.5$ .

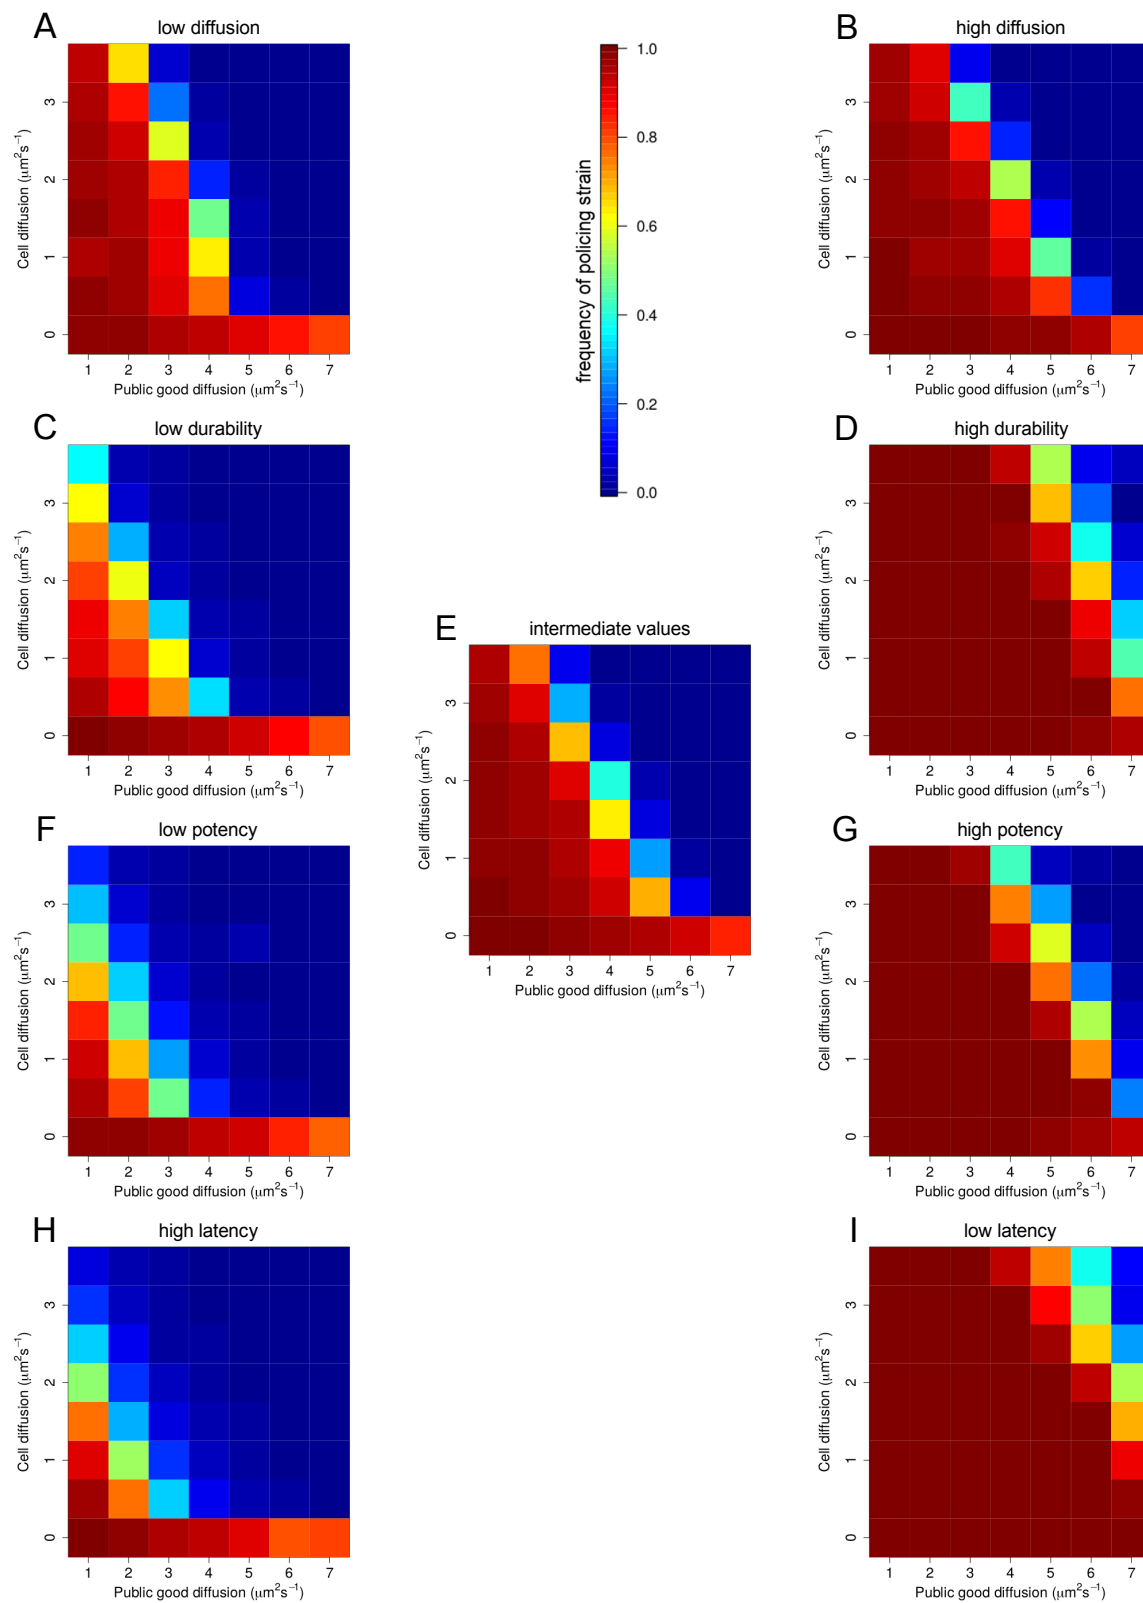

**Figure 5.** Heat maps exploring the effect of different toxin properties on the success of cooperation. We varied toxin diffusion  $d_{tox}$ , toxin durability  $\delta_{tox}$ , toxin potency  $\theta_T$  and toxin latency  $\kappa$  across a range of values (see Table 1) and show here heat maps of the frequency of the cooperator strain after the community reached carrying capacity for the lowest, highest and intermediate parameter values. At the center of the figure we placed a reference heat map (E), where all the parameters were set to intermediate values ( $d_{tox} = 4.0 \mu\text{m}^2/\text{s}$ ,  $\delta_{tox} = 500 \text{ s}$ ,  $\theta_T = 1000$ ,  $\kappa = 3.5$ ). We then varied toxin diffusion from 1.0 to 7.0  $\mu\text{m}^2/\text{s}$  (A, E and B), toxin durability from 50 to 5000 (C, E and D), toxin potency from 600 to 1800, (F, E and G) and toxin latency  $\kappa$  from 2.0 to 6.0 (H, E and I). We only varied a single parameter at the time, and kept all others at their intermediate default value used for (E).



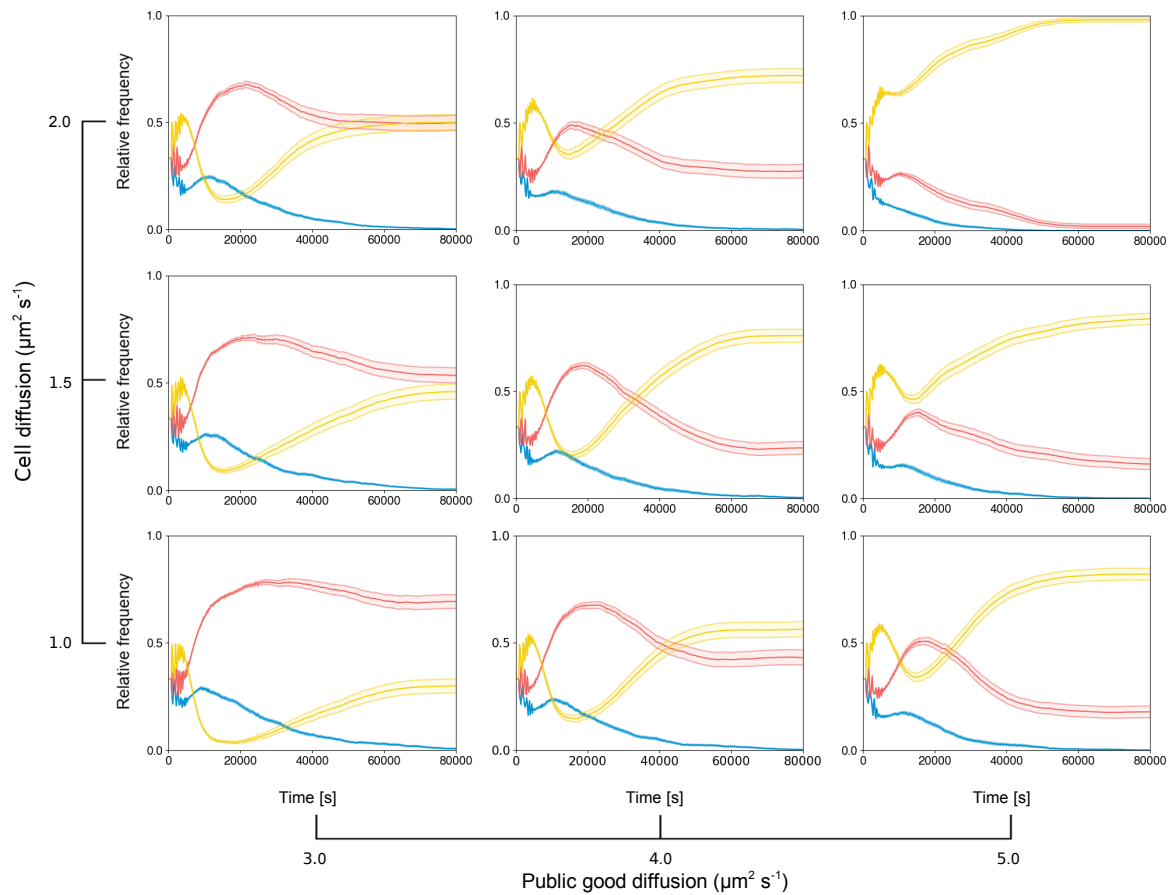

**Figure 6.** Policing is selected against when the genetic linkage between public good and toxin production breaks. Panels show simulated three-way interactions between cheaters  $C$  (yellow lines), cooperating policers  $P$  (blue lines), and toxin-resistant non-policing cooperators  $R$  (red lines) across a range of public good and cell dispersal values. We assume that  $R$  can directly evolve from the policing strain  $P$  when the genetic linkage between public good and toxin production breaks. If this happens, our simulations reveal that policers are always selected against. Trajectories show strain frequency fluctuations in continuous cultures over 80,000 time steps. Values depict means of 50 independent replicates with the standard error of the mean (transparent areas). For all simulations, we kept toxin properties constant:  $d_{tox} = 7.0 \mu\text{m}^2/\text{s}$ ,  $\delta_{tox} = 500 \text{ s}$ ,  $\theta_T = 1000$ ,  $\kappa = 3.5$ .

## SUPPLEMENTARY FIGURES

### Figure S1

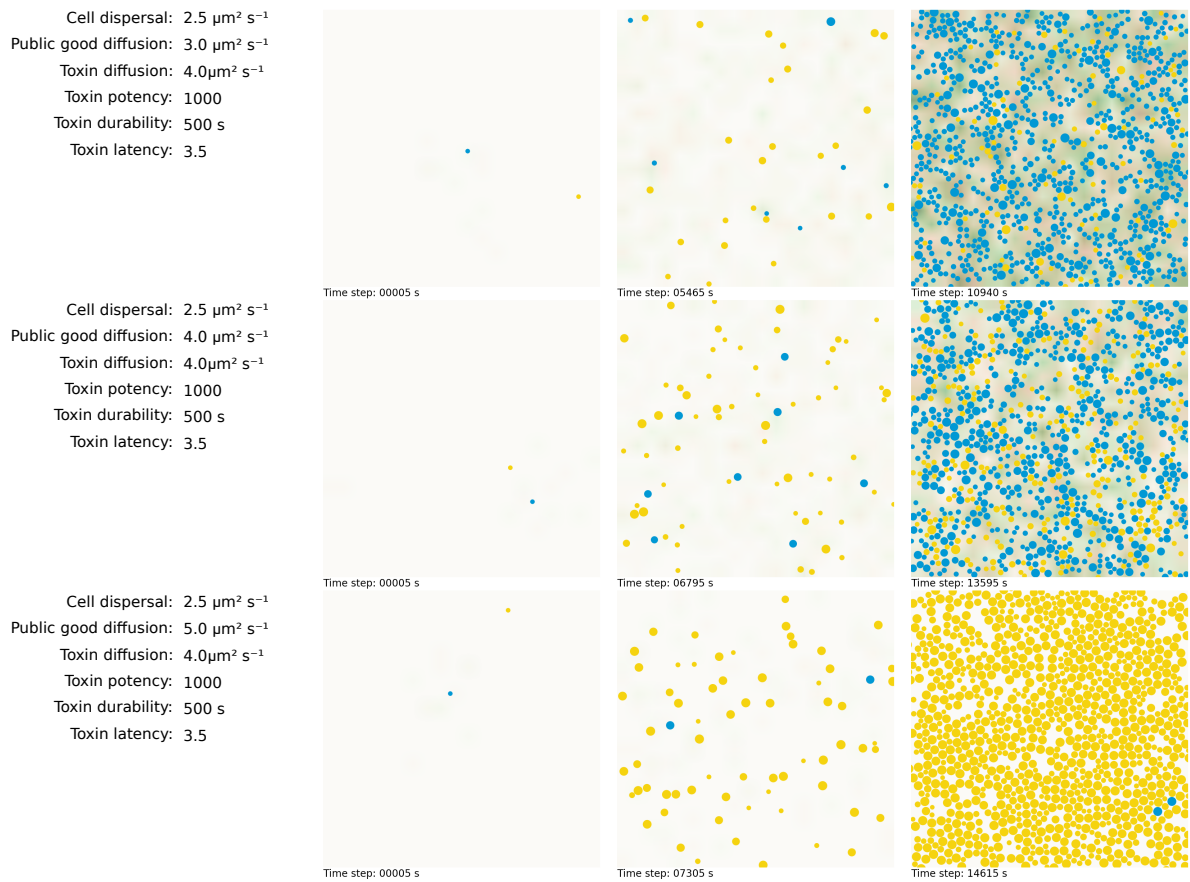

**Figure S1.** Point-in-time snapshots showing the spatial distribution of cooperating policers (in blue) and cheaters (in yellow) during competition under three different starting conditions. The point-in-time snapshots were taken during the early, intermediate and late simulation phase depicting the growth of digital bacteria in their simulated environments. The only parameter we varied in these examples was public good diffusion  $d_{pg} = 3$ . The density of public goods and toxins are indicated by the intensity level of the background color. In green are the distribution of public goods and in red the toxins.

**Figure S2**

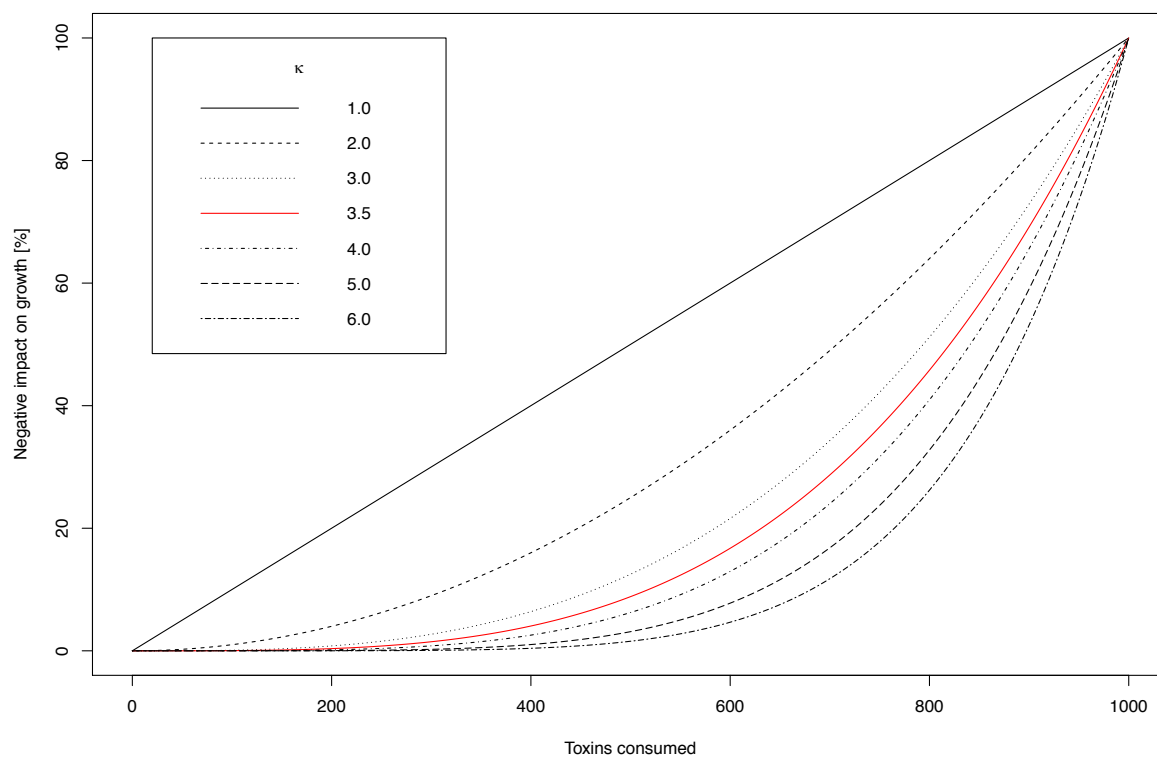

**Figure S2.** Effect of toxin latency  $\kappa$  on the growth rate of sensitive cells. Small values of  $\kappa$  lead to an immediate negative impact on growth, whereas larger values of  $\kappa$  extend the latency phase during which the growth of sensitive cells is not affected.

Figure S3

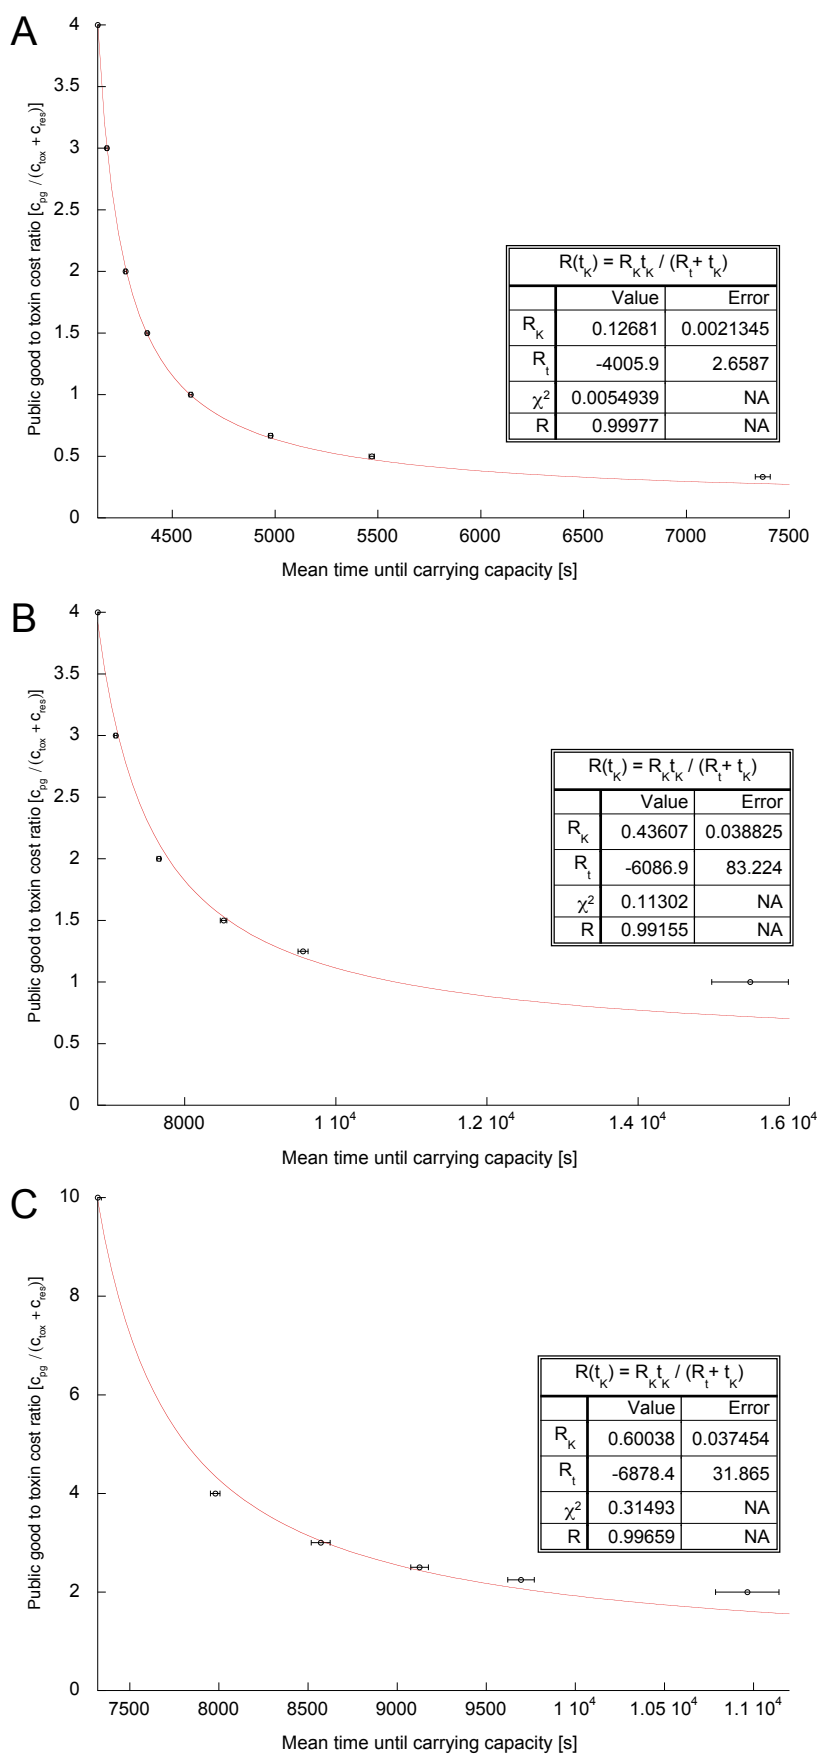

**Figure S3.** Monod's equation explains the relationship between the relative cost of policing and strain fitness. We simulated the growth of the policing strain (producing a toxin and a public good) in monoculture for a range of  $c_{pg}/(c_{tox} + c_{res})$  ratios, under three different diffusion regimes. We kept the cost of public good production constant at  $c_{pg} = 0.001$ , while varying the cost of toxins ( $c_{tox} + c_{res}$ ) from 0.00025 to 0.004. The fitness of the policing strain (measured as the time required to reach carrying capacity) declined with higher relative toxin costs. The decline was adequately captured by Monod's equation under conditions of (A) low diffusion (coefficient of correlation  $R = 0.999$ ); (B) medium diffusion ( $R = 0.991$ ); and (C) high diffusion ( $R = 0.997$ ). However, the equation does not fully capture the observed pattern when the ratio approaches one, namely when  $(c_{tox} + c_{res}) \approx c_{pg}$ , under conditions of low environmental diffusivity. This is partially understandable since  $R(\tau_K)$  does not directly take the viscosity of the medium into account. Details on diffusion parameter values can be obtained from Figure 3. Open circles show means of 50 independent replicates with the standard error of the mean.
